# Supplementary material
Source: PubMed Central journal article supplement (PMC3351910)
Supplement: cr2011195x9.pdf [file cr2011195x9.pdf]

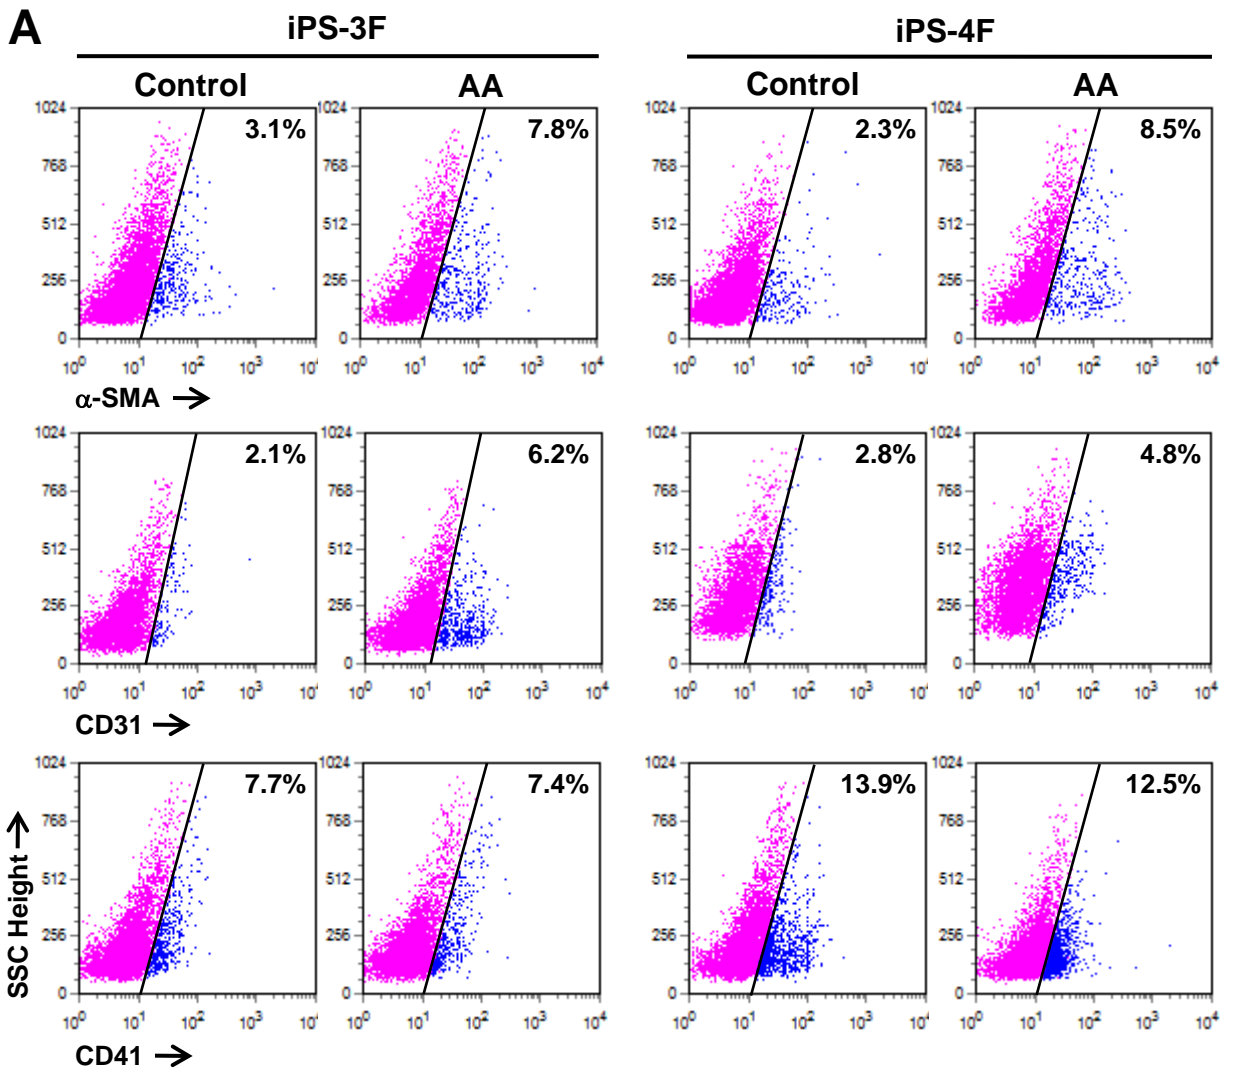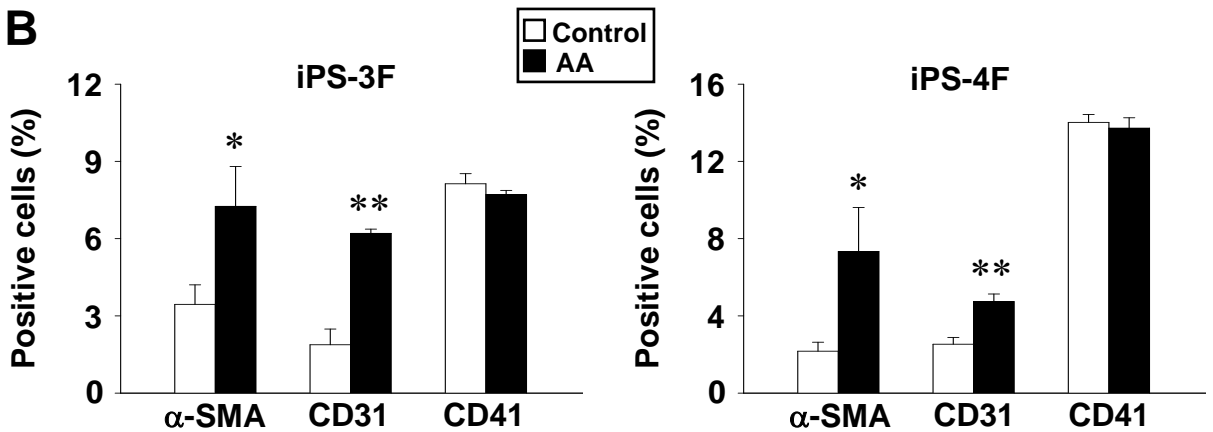

**Supplementary Figure 4** AA increases the proportion of smooth muscle, endothelial but not hematopoietic progenitor cells. A and B, Representative (A) and averaged (B) results of Fluorescence Activated Cell Sorter (FACS) analysis showing the percentage of  $\alpha$ -SMA (smooth muscle), CD31 (endothelial), CD41 (hematopoietic progenitor) positive cells in the total population derived from both iPSC lines with or without AA treatment. Results are obtained from day-12 EBs from at least three assays and expressed as means  $\pm$  SEM. \* $P$ <0.05, \*\* $P$ <0.01 vs. control.
