# Supplementary material
Source: PubMed Central journal article supplement (PMC3351910)
Supplement: cr2011195x12.pdf [file cr2011195x12.pdf]

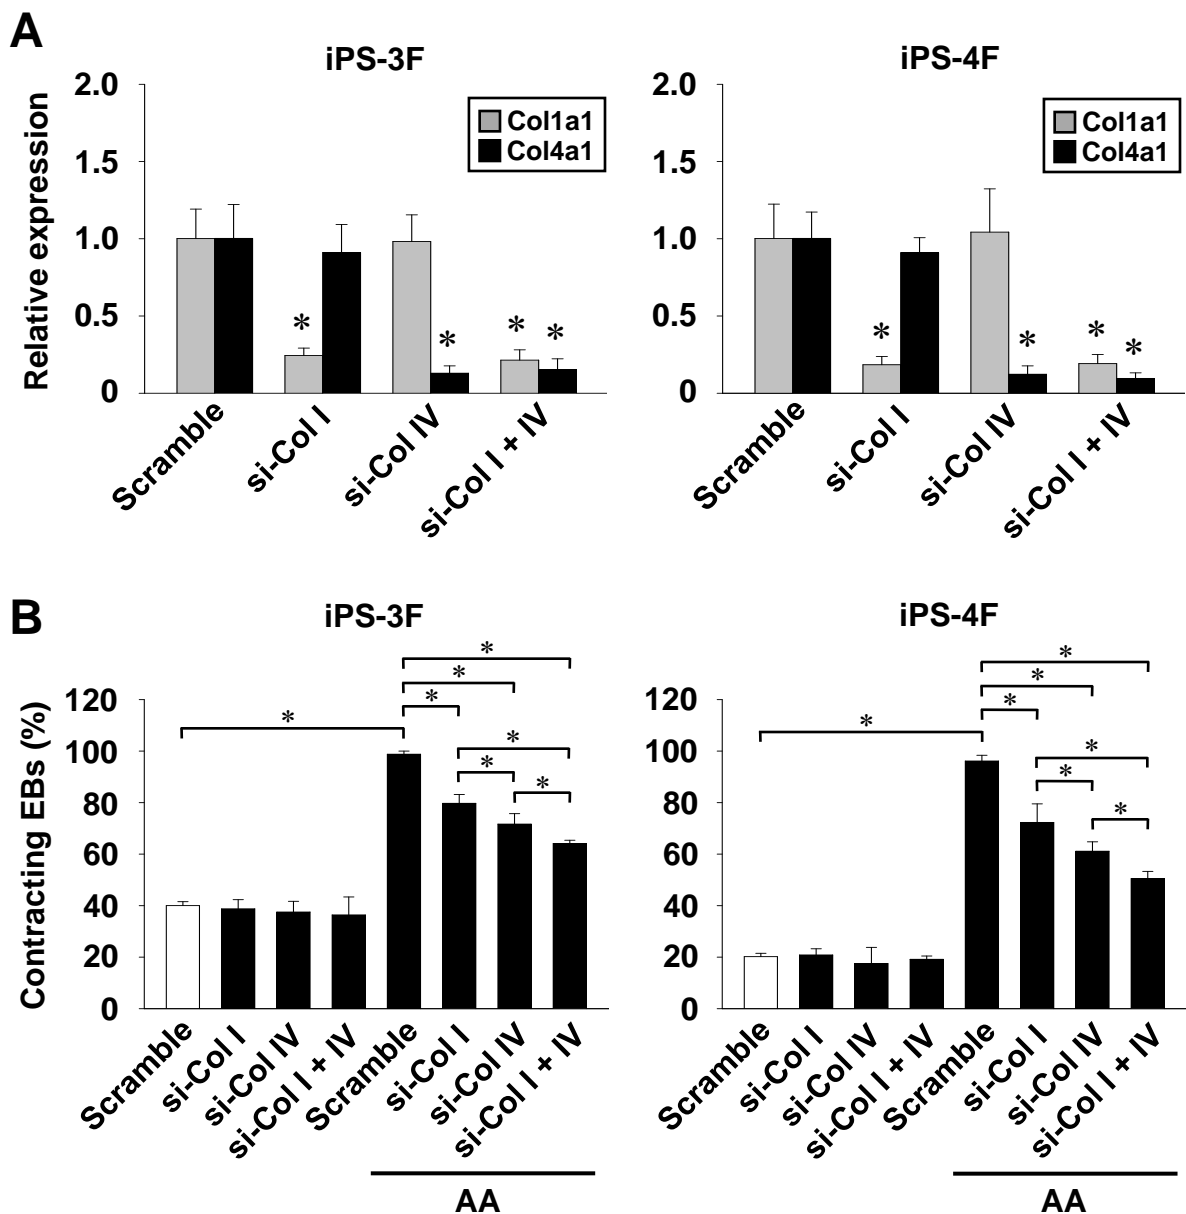

**Supplementary Figure 7** Cardiomyocyte-promoting effect of AA is partially abolished by siRNA-mediated stable silencing of type I and IV collagen (Col I and Col IV). A, Quantitative RT-PCR analysis of the expression of collagen genes *Col1a1* and *Col4a1* in cells transfected with scramble siRNA or siRNA against Col I or/and Col IV (n=3). \* $P < 0.01$  vs. scramble. B, Percentage of contracting EBs in siRNA-knockdown or scramble siRNA-treated iPSCs with or without AA-simulation (n=3). \* $P < 0.01$  vs. corresponding values. Data are expressed as means  $\pm$  SEM. Similar results were seen by using an independent siRNA sequence and not shown.
