# Supplementary material
Source: PubMed Central journal article supplement (PMC3351910)
Supplement: cr2011195x14.pdf [file cr2011195x14.pdf]

**A**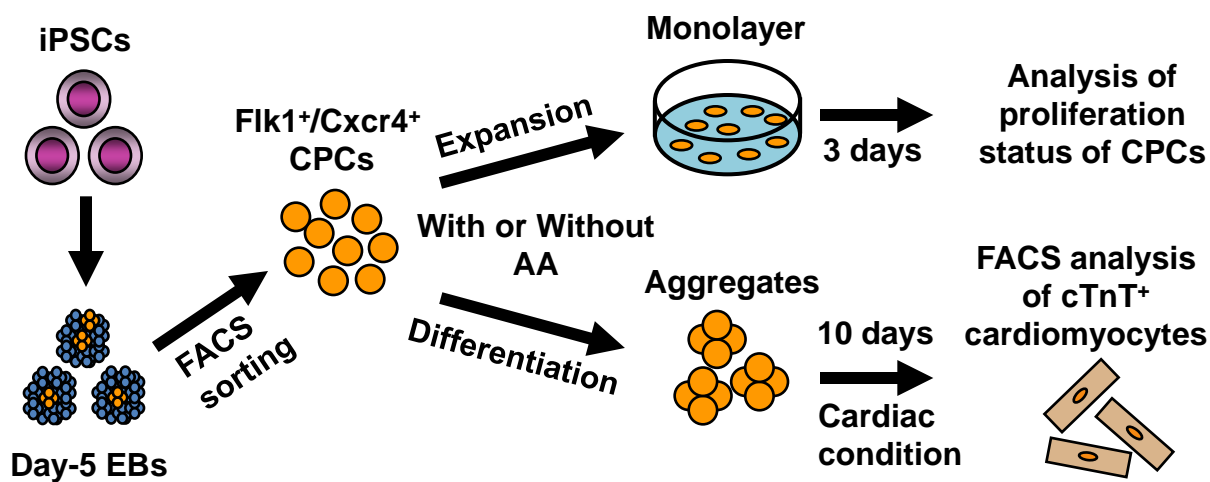**B**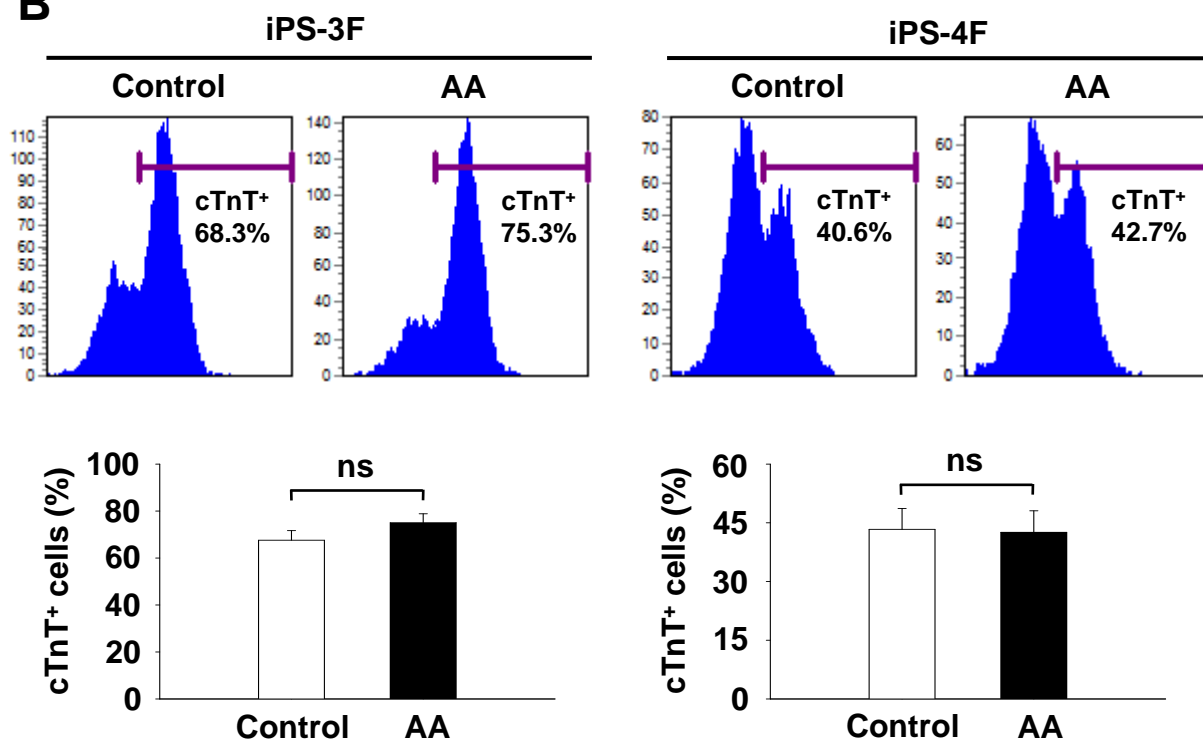

**Supplementary Figure 9** AA does not affect the differentiation potential of sorted cardiac progenitors (CPCs). A, Schematic diagram of the strategy for analyzing the role of AA in expansion or differentiation of the CPCs. B, Representative (upper panel) and averaged (lower panel) results of Fluorescence Activated Cell Sorter (FACS) analysis of the percentage of  $cTnT^+$  cardiomyocytes in the total population of  $Flk1^+/Cxcr4^+$  CPCs, which were sorted by FACS at day-5 and cultured in differentiation conditions for 10 days with or without AA-treatment ( $n=3$ ). Results are expressed as means  $\pm$  SEM. ns, no significant difference.
