# Supplementary material
Source: PubMed Central journal article supplement (PMC3351910)
Supplement: cr2011195x15.pdf [file cr2011195x15.pdf]

**A**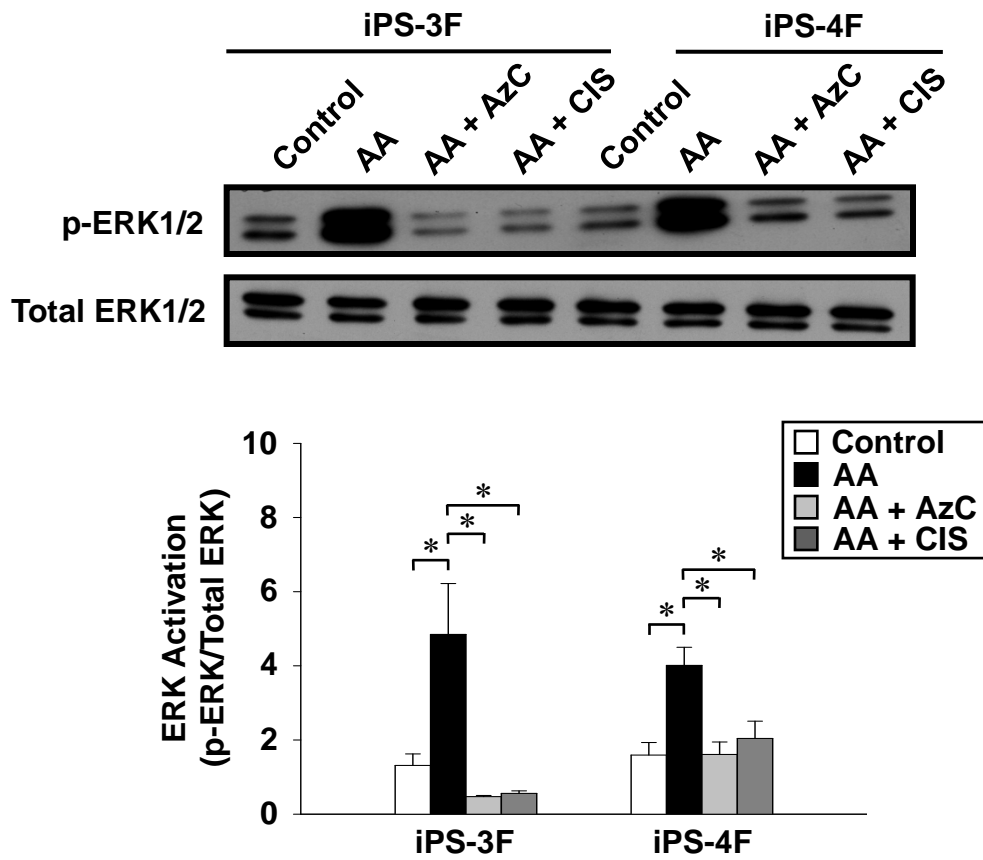

**Supplementary Figure 10** AA activates ERK signaling in a collagen synthesis-dependent manner. The whole cell extracts at day-5 were analyzed by Western blot with phospho-specific antibodies against ERK1/2 (p-ERK1/2). The amounts of total ERK1/2 was shown as loading control. ERK activation is defined as the ratio of p-ERK/total ERK. Data are quantified from 5 assays and expressed as means  $\pm$  SEM. \* $P < 0.01$  vs. corresponding values.
